1

---

# How do owners perceive dominance in dogs?

2

Enikő Kubinyi\*, Lisa Wallis

3

*Department of Ethology, Eötvös Loránd University, Pázmány Péter sétány 1/c, 1117, Budapest,*

4

*Hungary*

5

**Keywords:** dominance, submission, deference, domestic dog, intraspecific communication, animal

6

personality

---

7

8

9

## 1. Summary

10

Dominance is a well-established phenomenon in ethology, however the dog-owning public often

11

misuses the term. A questionnaire study was launched to investigate the validity of owner-derived

12

estimates of dominance in dog dyads sharing the same household (N=1151). According to the

13

owners, dominant dogs (87%) have priority access to resources (resting place, food, and rewards),

14

undertake certain tasks (defend the group during perceived or actual threats, bark more when a

15

stranger comes to the house, and lead the group during walks), display dominance (lick the other's

16

mouth less, win fights, and mark over the other's urine), have a certain personality (smarter, more

17

aggressive and impulsive), and were older than their partner dog (all  $p < 0.0001$ ). An age related

18

hypothesis has been suggested to explain formal dominance in dogs; however, we found that

19

dominance status was a better predictor than age status for 11 of the items examined. Results

20

suggest that dog owners' estimates of dominance rank correspond to previously established

21

behavioural markers of dominance displays. Size and physical condition were unrelated to

22

dominance. Surprisingly, in mixed-sex dyads, females were more frequently dominant than males.

23

For future studies that wish to allocate dominance status using owner report we offer a novel 6-item

24

survey.

---

\* Corresponding author: Enikő Kubinyi, [eniko.kubinyi@ttk.elte.hu](mailto:eniko.kubinyi@ttk.elte.hu)

25

## 26 2. Introduction

27 The term “dominance” when used in reference to dogs, has often been misunderstood in the  
28 popular media, which suggests that the public (and therefore the average dog owner) maybe unsure  
29 what dominance really is. For example, a dog is often referred to as dominant if it shows a  
30 particularly assertive personality, and very often dominance is used to describe the relationship  
31 between the dog and the owner, rather than the relationship between dogs living in multi dog  
32 households. To address the misuse and misunderstanding of the word in the general vocabulary of  
33 dog owners and trainers, we aimed to evaluate whether the dog-owning public recognised dominant  
34 individuals in multi-dog households, and what attributes they associated with dominance.

35 In ethology, the term dominance describes long-term dominant-subordinate social relationships  
36 within a dyad or group. Dominant individuals usually have priority access to key resources such as  
37 food, and reproductive partners, due to the consistent winning of agonistic interactions [1,2] or  
38 deference, during which one individual consistently gives way to another [3,4]. Based on  
39 observations in macaques, de Waal distinguishes agonistic dominance, established through force in  
40 agonistic interactions, and formal dominance, based on the acceptance of the dominant individual by  
41 the group, signalled through for example ritualistic greetings [5].

42 Although dominance hierarchies have previously been described in free-ranging dogs [6–8], in dogs  
43 living in packs in enclosures [9–11], and in neutered pet dogs at a dog day care centre [12,13], the  
44 existence and validity of linear dominance hierarchies in these animals is highly debated (mainly  
45 because they are rare and have only been detected by examining submissive behaviours such as  
46 mouth licks) [11,14–20]. Thus, dominance hierarchies in dogs can be detected without agonistic  
47 interactions (i.e. aggression). For example, in multi-dog households one dog might defend a  
48 particular toy while another is not interested in that toy but instead values sleeping in a particular  
49 bed. Because these dogs defer to the priority of the other, there are no agonistic interactions

50 between them. If these dogs peacefully co-exist without social interactions (they avoid each other)  
51 there is no dominance hierarchy between them, and their relationship is 'non-interactive' according  
52 to the definition of Trisko et al. [13]. If dogs affiliate regularly (e.g. play with each other) without  
53 agonistic behaviour and exhibiting dominance, their relationship is 'egalitarian'. However, it is also  
54 possible that dogs living together both affiliate and exhibit dominance (and thus show 'formal'  
55 dominance), or do not affiliate but exhibit dominance (known as 'agonistic' dominance) [13]. In a  
56 group of 24 neutered companion dogs at a day-care facility, most dogs formed dominance  
57 relationships with other dogs. Dominance hierarchies were identified based on frequent submission  
58 (e.g. muzzle lick and low posture) and infrequent, low intensity aggression (threat and attack). Older  
59 dogs out-ranked younger dogs, but size was unrelated to dominance rank. Dominance relationships  
60 were most commonly found in same-sexed pairs [12].

61 Although problem behaviours such as jumping or excessive humping are sometimes interpreted by  
62 the public, including dog trainers, as the dog's desire to be the "alpha", or the head of the household,  
63 dominance is not "misbehaviour". According to our present knowledge, dogs are unlikely to have a  
64 concept of "hierarchy", as they lack the cognitive processes that would be necessary for such a  
65 strategy. Instead, dogs' relationships with other dogs (and with people) are built up progressively  
66 through associative learning [20]. Bradshaw et al. [18,20] have stressed that intra-specific dominance  
67 should not be used to support the concept of inter-specific hierarchy, such as the outdated "alpha  
68 dog" myth, which stipulates that owners should maintain their leadership over their dog through  
69 force and intimidation if necessary, in order to become the "alpha" or "pack leader". Such obsolete  
70 beliefs have often been used to justify the use of abusive training techniques, and were based on  
71 erroneous models of wolf pack organisation, which were used to explain aspects of dog behaviour  
72 [18]. Indeed, the use of positive punishment and negative reinforcement training techniques can  
73 cause increased stress, fear and mistrust, and are associated with increased aggression towards  
74 other dogs in the household [21], and towards human family members [22]. Behavioural

75 modification based on operant and classical conditioning can provide an effective intervention for  
76 inter- and intra-specific aggression problems [17].

77 Dominance describes social relationships, therefore, according to ethologists, it is not a personality  
78 trait. Personality is largely independent of context and it is stable over time [23], while dominance  
79 status depends on the interacting partners. However, some dog owners describe dogs that often  
80 show dominant behaviour towards other dogs as having a “dominant personality”. This  
81 misunderstanding can be partly explained by the fact that based on a literature review on canine  
82 personality, psychologists have identified a broad dimension labelled as ‘Submissiveness’, and  
83 defined it as the opposite of dominance. According to the authors, “Dominance can be judged by  
84 observing which dogs bully others, and which guard food areas and feed first. Submission can also be  
85 reflected by such behaviors as urination upon greeting people” [24]. Thus, even in the scientific  
86 literature there are inconsistencies regarding dominance as a personality trait. Moreover, dominance  
87 status has been found to be associated with some personality traits (e.g. aggression towards people)  
88 and also with leadership [7,25], which suggests that certain personality traits affect dominance ranks.  
89 Leadership, in contrast to dominance, cannot be forced or demanded, as it requires followers who  
90 choose to follow for their own benefit. More technically, leadership is a non-random differential  
91 effect on group activities. Using directional correlation analysis on high-resolution spatio-temporal  
92 GPS trajectory data from a group of six dogs, leader and follower roles in dyads were found to be  
93 dynamically interchangeable. However, on a longer timescale, leader and follower tendencies to lead  
94 became clearer. The dogs’ positions in the leader-follower network positively correlated with  
95 dominance rank, trainability, controllability, aggression, and age [25].

96 Because of the commonly found link of dominance with age, Bradshaw et al. [26] suggested that a  
97 simple rule of thumb could help to explain formal dominance in dogs: “in order to be allowed to stay  
98 in the group, perform affiliative behaviour towards all the members of the group older than you are”.

99 This hypothesis could also explain unidirectional hierarchical relationships found in companion dogs  
100 living in multi-dog households. Indeed, a body of literature using field observations, suggests that

101 among dogs and the closely related wolf, older individuals are more likely to be dominant and/or  
102 leaders [6,7,12,27,28]. In free-ranging dogs, leaders were more likely to receive submissive displays  
103 in both greeting ceremonies and in agonistic contexts from many partners, and leadership was also  
104 dependent on group composition [7], suggesting that it is not an inherent characteristic of  
105 individuals, similarly to dominance.

106 As mentioned previously, dominance relationships differ between same-sexed and mixed-sexed  
107 dyads, as mixed-sex dyads are more likely to affiliate and less likely to show dominance than same-  
108 sex pairs [12]. Conflicts between dogs living in the same household have been reported to occur  
109 more often between members of the same-sex, and more often involve females than males [29,30].  
110 In wolves, separate male and female age-graded dominance hierarchies have been observed in  
111 captive packs [31]. Male wolves were on average found to be more often dominant and/or leaders of  
112 the pack [27,32,33]. In one study on free-ranging dogs, a sex age graded hierarchy was found, such  
113 that males dominate females in each age class, and adults dominate over subadults, and subadults  
114 over juveniles. Adult males were on average larger than adult females, but there were no differences  
115 in body size among subadults and juveniles [6].

116 Dog breeds and breed groups differ greatly in morphology and typical behaviour [34,35][19].  
117 Therefore, social interactions and the types of relationships found in pet dogs may also be highly  
118 dependent on the breed composition of the group [36]. Based on the literature cited above,  
119 dominance hierarchies do exist among dogs living in the same household, albeit the characteristics of  
120 the social relationships are influenced by multiple factors, such as breed, personality, sex, and age.  
121 We conducted a questionnaire study to better understand how dog owners perceive dominance  
122 ranks, and which behavioural/physical traits and other demographic factors influence the assumed  
123 rank between dogs living in the same household. Both the benefits and the challenges of using a  
124 “citizen science” model, relying on the dog-owning public, are well-known [37]. The quality of data  
125 produced by citizen scientists has proved to be satisfactory not only in recognising dog behaviours  
126 but also for conducting behavioural experiments [37].

127 Several studies have utilised owner questionnaires in order to determine dominance rank in multi-  
128 dog households [25,38,39]. Pongrácz et al. [38] used a four item questionnaire to measure dogs'  
129 dominance levels in dyads, and related them to differences in social learning in response to a human  
130 or dog demonstrator. The questions focused on social behaviours that can be easily recognized and  
131 do not require assumptions from the owner regarding the dominance rank of the dog. The four  
132 questions were the following: (1) "When a stranger comes to the house, which dog starts to bark first  
133 (or if they start to bark together, which dog barks more or longer)?", (2) "Which dog licks the other  
134 dog's mouth more often?" (reverse scored), (3) "If the dogs get food at the same time and at the  
135 same spot, which dog starts to eat first or eats the other dog's food?", (4) "If the dogs start to fight,  
136 which dog wins more frequently?" Dogs were identified as dominant if they displayed at least three  
137 behaviours (e.g. barks more/longer, eats first, and wins fights). Dominant dogs were less likely to  
138 learn from observing other dogs and more likely to copy a human demonstrator. Subordinate dogs  
139 showed better learning in the dog demonstrator condition. Dominant dogs also performed better  
140 than subordinates in a problem solving task but only when observing a human demonstrator [39].  
141 Results indicate that owner questionnaires could be a valid method to determine the dominance  
142 rank of individuals within dog dyads.

143 We asked owners of multiple dogs, which of the dogs is dominant according to them, and  
144 investigated the relationship between the dogs' ranks, behaviour, and demography. In the  
145 questionnaire, we integrated items from previous studies [38,39], and added more items that might  
146 be linked to an individual's ability to win in contests over resources, or asymmetry in experience. In  
147 addition, we included other factors, which have previously been proposed to be relevant when  
148 measuring leadership and dominance, such as age, sex, size, physical condition, leadership and  
149 specific behavioural characteristics, including intelligence, obedience, aggressiveness, and  
150 impulsiveness [2,6,40,41].

151 We hypothesized that dominance as perceived by the owners is related to specific behaviours such  
152 as controlling resources, and to demographic and specific behavioural trait factors. We also tested

153 the age related hypothesis suggested by Bradshaw et al. [26] by comparing which factor best  
154 explained behavioural and demographic differences between the dyads, owner reported hierarchical  
155 status or age status.

156

157

### 158 3. Materials and Methods

159

#### 160 Subjects

161 Between 25th June and 13th August 2017, 1156 owners of two or more dogs filled in a questionnaire  
162 in Hungarian, which was advertised in a social media Dog Ethology group. We identified the dogs  
163 using their given names, to ensure that no duplicate entries were included in the analysis. After  
164 deleting questionnaires with missing data, 1151 responses remained, which detailed owners'  
165 responses for unique individual pairs of dogs. Owners indicated the sex and reproductive status of  
166 each dog in the dyad, after allocating them to either Dog A or Dog B (based on their own choice).  
167 Both dogs were male in 23% of the pairs, both were females in 28%, both dogs were neutered in 37%  
168 of the pairs, and 30% of pairs were both intact. Counting each dog separately, N = 2302 individuals,  
169 there were 47.13% males, and 53.87% neutered individuals.

170

#### 171 Procedure

172 The questionnaire consisted of 21 items (Table 1). In the case of items 1-19, owners indicated which  
173 of the two dogs best fits the description: Dog A, or Dog B. Owners could also select "Similar" if both  
174 dogs fitted the description, or "N/A". When the owners marked "N/A" we assumed that they could  
175 not answer the question as the dog/dogs did not display that behaviour, or that situation did not  
176 occur (e.g. the dogs never fight with each other or they do not go for walks together), or they were  
177 unsure/did not fully understand the question, or the answer was not known to them (e.g. they could

178 not assess which of the dogs was in better physical condition). Items 2-4 and 6 were the same as  
 179 those used in [38]. In the case of items 20 and 21, the owner could also indicate “both” or “neither”  
 180 dogs (Table 1).  
 181

| Item number | Short form         | Questionnaire 1: Relative characteristics                                                                                               |
|-------------|--------------------|-----------------------------------------------------------------------------------------------------------------------------------------|
| 1           | status             | Which of the dogs is the “boss” (has a dominant status) to the best of your knowledge?                                                  |
| 2           | bark               | When a stranger comes to the house, which dog starts to bark first (or if they start to bark together, which dog barks more or longer)? |
| 3           | lick mouth         | Which dog licks the other dog’s mouth more often?                                                                                       |
| 4           | eat first          | If the dogs get food at the same time and at the same spot, which dog starts to eat first or eats the other dog’s food?                 |
| 5           | reward             | If they got a special reward (e.g. a marrowbone), which dog obtains it?                                                                 |
| 6           | fight              | If the dogs start to fight, which dog wins more frequently?                                                                             |
| 7           | play ball          | If you play with a ball with both dogs, which one retrieves it more frequently?                                                         |
| 8           | greet owner        | When you enter your home, which dog greets you first?                                                                                   |
| 9           | walk first         | Which dog goes in the front during walks?                                                                                               |
| 10          | resting place      | Which dog acquires the better resting place?                                                                                            |
| 11          | pee                | Which dog marks over the other’s pee?                                                                                                   |
| 12          | defend group       | If the dog’s group is perceived as being under attack, which dog is in the front?                                                       |
| 13          | smart              | Which dog is smarter?                                                                                                                   |
| 14          | obedient           | Which dog is more obedient?                                                                                                             |
| 15          | aggressive         | Which dog is more aggressive?                                                                                                           |
| 16          | impulsive          | Which dog is more impulsive?                                                                                                            |
| 17          | size               | Which dog is heavier?                                                                                                                   |
| 18          | physical condition | Which dog is in a better physical condition?                                                                                            |
| 19          | age                | Which dog is older?                                                                                                                     |
| 20          | sex                | Which dog is male?                                                                                                                      |
| 21          | neutered           | Which dog is neutered?                                                                                                                  |

182  
 183 Table 1. Questionnaire items. Owners were asked to fill out the questionnaire for two of their dogs  
 184 (‘A’ and ‘B’) and indicate which dog corresponds better to the description. They could also select  
 185 “Similar” if both dogs fitted the description or “N/A” if the question did not apply to the dog dyad.  
 186  
 187 Statistical Analysis



188 Analyses were performed in SPSS 22.0 and R. Descriptive statistics were calculated for the sample  
189 and summarised in the results section. To investigate the certainty of owners in their answers, and  
190 the usefulness of each item in terms of whether they might be suitable to scrutinise status  
191 differences in behaviour/demographics, we examined which “N/A” and “Similar” proportions were  
192 one standard deviation below or above the mean.

193

194 Binomial tests using Dominance Status on the full sample

195 To investigate the owners’ responses for each item (1 to 21), we calculated the percentage allocation  
196 of the dogs to each possible category: “Differ” (the dogs in a particular dyad differed in that  
197 behaviour/characteristic), “Similar” (the dogs’ behaviour was similar) and “N/A” (the owner was not  
198 able to determine if the dogs differed). Next, for the dogs that were allocated a “dominant” or a  
199 “subordinate” status (the response of the owner to item 1 (“Which of your dogs is the  
200 boss/dominant?”)), binomial tests were used to compare the distribution of observations between  
201 the dogs for each of the replies to items 2 to 21. Please note we did not consider dyads where  
202 owners indicated in item 1 (“Which of your dogs is the boss/dominant?”) that their dogs were  
203 “Similar” in status, or where they marked “N/A” (N=148). Then, for items (2-21), dyads were also  
204 excluded from the analysis pairwise, if the owner marked them as “Similar” or “N/A” in that  
205 particular behaviour or characteristic (sample sizes are indicated in Figure 1).

206 We examined whether each behaviour/physical attribute was equally likely to occur in dominants  
207 and subordinates (derived from item 1) using a two-tailed test. We lowered the p level to 0.0023  
208 from 0.05 as suggested by a Bonferroni correction for the 22 comparisons.

209

210 Binomial tests using Age Status on the full sample

211 We then repeated the binomial analyses but instead of dominance status, we used the response of  
212 the owner to Age (“Which of your dogs is older?”, item 19), to assess differences between dogs  
213 allocated an “older” or “younger” status (dogs which were “Similar” in age, or that where marked

214 “N/A”, N=72, were excluded). Next, we used two-sample tests for equality of proportions with  
215 continuity correction in order to determine which factor (Dominance status or Age status) best  
216 explained the behavioural and demographic differences between the dogs.

217

218 Binomial tests on the mixed-sex and same-sex dyads

219 In order to examine any effect of the dyad composition on dominance status allocation, we created  
220 subsets of data including mixed sex dyads (N=491), and same-sex dyads (N=512), and ran additional  
221 binomial tests to inspect possible associations for items 2 – 21. We again adjusted for multiple  
222 comparison using Bonferroni correction, and lowered the significance level to 0.0025.

223

224 Dominance Score and Difference Score

225 Next, we aimed to examine how large the difference in ranks between same-sexed, mixed-sexed,  
226 neutered, and intact dyads. We created a “Dominance Score”, by summing all the items that were  
227 significantly associated with a “dominant” status (see below: bark, lick mouth, eat first, reward, fight,  
228 walk first, resting place, pee, defend group, smart, aggressive, and impulsive) for each dog in every  
229 dyad. Then we created a “Difference score” by subtracting the subordinates’ “Dominance score”  
230 from the dominants’ for each dyad. After a power transformation to achieve normal distribution  
231 (Boxcox, lamda = 0.67, three outliers removed) the “Difference score” was then used as the response  
232 variable in a General linear model that was performed in R, to identify the key variables associated  
233 with Dominance score. The sixteen possible sex and neuter status combinations of the dominant and  
234 subordinate dyads were entered as a fixed factor (dyad), as well as the age status of the dominant  
235 (the first two letters characterise the dominant’s sex and neutered status, last two letters  
236 characterise the subordinate’s sex and neutered status: MIFI: dominant = male intact, subordinate =  
237 female intact (N = 45); MIFN: male intact female neutered (N = 50); MIMI: male intact male intact (N  
238 = 100); MIMN: male intact male neutered (N = 14); MNFI: male neutered female intact (N = 36);  
239 MNFN: male neutered female neutered (N = 66); MNMI: male neutered male intact (N = 41); MNMN:

240 male neutered male neutered (N = 44); FIFI: female intact female intact (N = 89); FIFN: female intact  
241 female neutered (N = 45); FIMI: female intact male intact (N = 45); FIMN: female intact male  
242 neutered (N = 20); FNFI: female neutered female intact (N = 40); FNFN: female neutered female  
243 neutered (N = 128); FNMI: female neutered male intact (N = 86); FNMN: female neutered male  
244 neutered (N = 98)). We also included the order the dogs were entered into the questionnaire (Dog A  
245 and Dog B) to examine order effects. We included only the dyads where an asymmetry in dominance  
246 was detected by the owner (N= 931). We set Male Intact Female Intact (MIFI) as the comparison for  
247 the dyad factor as this combination had the highest Difference score.

248

## 249 4. Results

250

251 Descriptive statistics

252 The descriptive statistics are presented in Figure 1. Eighty-seven percent of owners indicated that  
253 their dogs differed in their social status, 10% perceived them as similar, and 3% marked the question  
254 as “N/A”. Dogs were designated as “Similar” more often than the mean + SD ( $16.1 + 8.6 = 24.7\%$ ) in  
255 three items: greeting the owner, smartness, and physical condition. Only 7.1-7.3 percent of owners  
256 claimed that their dogs were similar in size and age (which is lower than the mean – SD:  $16.1 - 8.6 =$   
257 7.5, Fig. 1).

258 The owners marked four items as “N/A” more often than the mean + SD ( $8.8 + 7.3 = 16.1$ ): lick  
259 mouth, fight, pee, and aggressive (16.2-24.3%). Most respondents could assess differences between  
260 their dogs regarding size, age and obedience, as only around 0.7-1.4% of owners indicated “N/A”  
261 (which is lower than the mean – SD:  $8.8 - 7.3 = 1.5$ ).

262

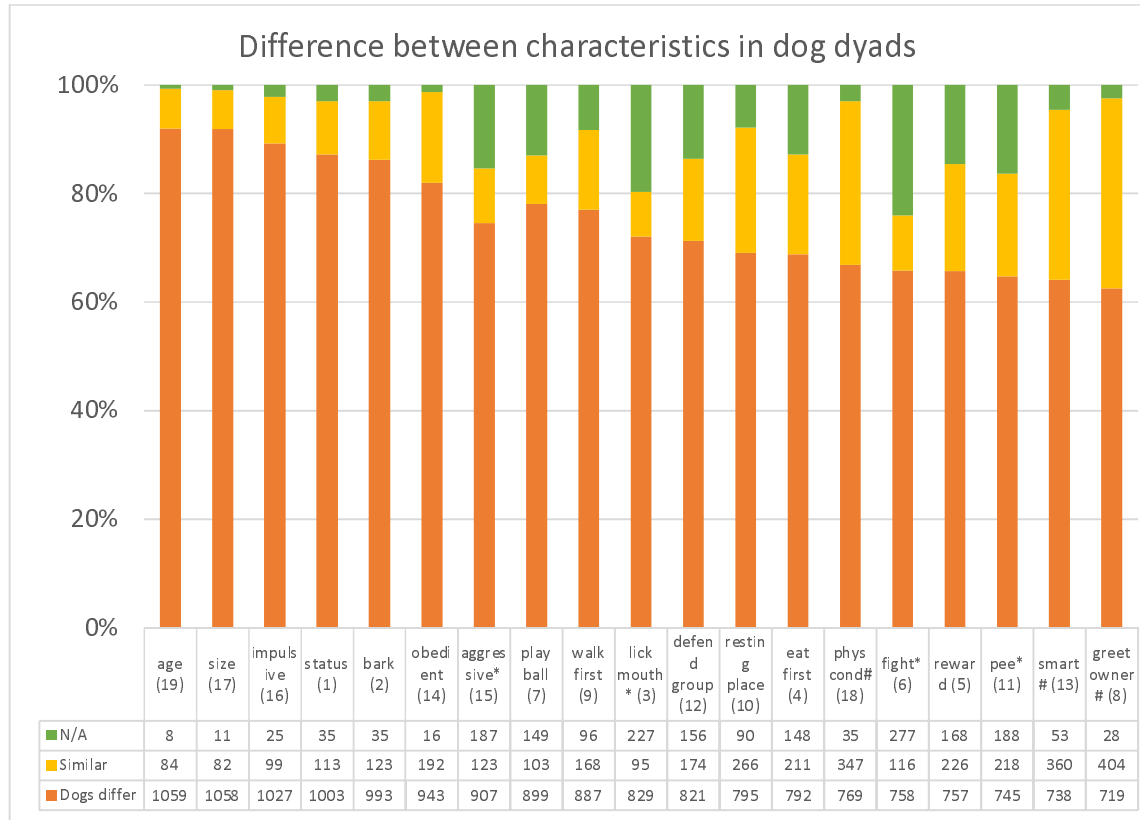

263

264 Figure 1. Descriptive statistics of the sample. Items in which owners responded that the two dogs

265 were “Similar” more often than 1 SD above mean (>24.7%) are indicated with #. Items where owners

266 indicated “N/A” more often than 1 SD above mean (>16.1%) are marked with \*. Item numbers are in

267 brackets. Sample sizes are indicated in the table below the graph.

| Item           | Dominance Status |       |       |       |          | Age Status |       |       |        |          | Prop. diff | 2-sample test for equality of proportions |          |        |        |
|----------------|------------------|-------|-------|-------|----------|------------|-------|-------|--------|----------|------------|-------------------------------------------|----------|--------|--------|
|                | Count            | Total | Prop  | Z     | P        | Count      | Total | Prop  | Z      | P        |            | X2                                        | P        | 95% CI |        |
| Bark           | 547              | 884   | 0.619 | 7.03  | <0.0001* | 512        | 920   | 0.557 | 3.40   | <0.0001* | 0.062      | 6.953                                     | 0.008    | 0.016  | 0.109  |
| Lick mouth     | 259              | 737   | 0.351 | -8.03 | <0.0001* | 218        | 779   | 0.280 | -12.25 | <0.0001* | 0.071      | 8.669                                     | 0.003    | 0.024  | 0.120  |
| Eat first      | 473              | 717   | 0.660 | 8.51  | <0.0001* | 400        | 746   | 0.536 | 1.94   | 0.0261   | 0.124      | 22.662                                    | <0.0001* | 0.072  | 0.175  |
| Reward         | 497              | 684   | 0.727 | 11.81 | <0.0001* | 386        | 714   | 0.541 | 2.13   | 0.0164   | 0.186      | 51.141                                    | <0.0001* | 0.135  | 0.237  |
| Fight          | 606              | 700   | 0.866 | 19.31 | <0.0001* | 443        | 703   | 0.630 | 6.86   | <0.0001* | 0.236      | 101.920                                   | <0.0001* | 0.190  | 0.281  |
| Play ball      | 404              | 793   | 0.509 | 0.50  | 0.7150   | 349        | 835   | 0.418 | -4.71  | <0.0001* | 0.091      | 13.330                                    | <0.0001* | 0.042  | 0.141  |
| Greet owner    | 352              | 644   | 0.547 | 2.32  | 0.0100   | 295        | 674   | 0.438 | -3.20  | <0.0001* | 0.109      | 15.194                                    | <0.0001* | 0.054  | 0.164  |
| Walk first     | 532              | 795   | 0.669 | 9.50  | <0.0001* | 430        | 824   | 0.522 | 1.22   | 0.1114   | 0.147      | 35.819                                    | <0.0001* | 0.099  | 0.196  |
| Resting place  | 517              | 716   | 0.722 | 11.85 | <0.0001* | 425        | 754   | 0.564 | 3.46   | <0.0001* | 0.158      | 39.352                                    | <0.0001* | 0.109  | 0.208  |
| Pee            | 400              | 669   | 0.598 | 5.03  | <0.0001* | 372        | 697   | 0.534 | 1.74   | 0.0407   | 0.064      | 5.465                                     | 0.019    | 0.010  | 0.118  |
| Defend group   | 527              | 739   | 0.713 | 11.55 | <0.0001* | 437        | 760   | 0.575 | 4.10   | <0.0001* | 0.138      | 30.545                                    | <0.0001* | 0.089  | 0.187  |
| Smart          | 433              | 665   | 0.651 | 7.76  | <0.0001* | 410        | 692   | 0.592 | 4.83   | <0.0001* | 0.059      | 4.710                                     | 0.030    | 0.651  | 0.593  |
| Obedient       | 415              | 838   | 0.495 | -0.24 | 0.6221   | 477        | 879   | 0.543 | 2.50   | 0.0063   | -0.048     | 3.679                                     | 0.055    | -0.096 | 0.001  |
| Aggressive     | 524              | 762   | 0.688 | 10.32 | <0.0001* | 392        | 780   | 0.503 | 0.11   | 0.4572   | 0.185      | 53.997                                    | <0.0001* | 0.136  | 0.235  |
| Impulsive      | 512              | 908   | 0.564 | 3.82  | <0.0001* | 313        | 952   | 0.329 | -10.53 | <0.0001* | 0.235      | 103.120                                   | <0.0001* | 0.190  | 0.280  |
| Size: heavier  | 497              | 929   | 0.535 | 2.10  | 0.0178   | 575        | 999   | 0.567 | 5.43   | <0.0001* | -0.032     | 3.051                                     | 0.081    | -0.086 | 0.005  |
| P Cond: Better | 353              | 687   | 0.514 | 0.69  | 0.2461   | 209        | 734   | 0.285 | -11.63 | <0.0001* | 0.229      | 76.941                                    | <0.0001* | 0.175  | 0.280  |
| Age: Older     | 615              | 931   | 0.661 | 9.77  | <0.0001* |            |       |       |        |          |            |                                           |          |        |        |
| Sex: Male      | 427              | 927   | 0.461 | -2.36 | 0.0090   | 503        | 990   | 0.508 | 0.48   | 0.3168   | -0.047     | 4.128                                     | 0.042    | -0.093 | -0.002 |
| Sex: Female    | 576              | 1078  | 0.534 | 2.22  | 0.0131   | 556        | 1128  | 0.493 | -0.45  | 0.6936   | 0.041      | 3.621                                     | 0.057    | -0.001 | 0.080  |
| Neutered       | 580              | 1073  | 0.541 | 2.63  | 0.0043   | 613        | 1133  | 0.541 | 2.73   | 0.0031   | 0          | 0.000                                     | 1.000    | -0.043 | 0.042  |
| Intact         | 423              | 933   | 0.453 | -2.82 | 0.0024   | 446        | 985   | 0.453 | -2.93  | 0.0017*  | 0          | 0.000                                     | 1.000    | -0.045 | 0.046  |

269

270 Table 2. Results of the binomial tests using the owners' allocation of the dogs to "dominant" or  
271 "subordinate" status (item 1) and "older" or "younger" status (item 19) as the predicted variables  
272 and the 21 items. Bold type indicates that status was associated with the characteristic after  
273 Bonferroni correction (for the Binomial tests all p values are  $\leq 0.0022$  and significant results are  
274 indicated with a \*). Two-proportion z-tests were used to determine whether the proportion of  
275 "dominant" and "older" dogs were equal for each item. P Cond= Physical condition, Prop =  
276 Proportion, Prop Diff = Proportion difference, and 95% CI=95% Confidence intervals.

277

278 Binomial tests using Dominance Status on the full sample

279 We tested which items (from items 2-21) were associated with the perceived dominance rank. The  
280 binomial tests revealed that dogs the owners considered as dominant (i.e. the "boss" at home, item  
281 1) bark sooner/more, lick the other's mouth less, eat food and obtain rewards first, win most fights,  
282 and walk in the front during walks. They more often obtained better resting places, marked over the  
283 other's pee, and defended the group in case of perceived danger. "Dominant" dogs were also  
284 reported to be smarter, more aggressive, and more impulsive, than their partner dog, and they were  
285 more often the older dog in the dyad ( $p < 0.0001$ ; see Table 2 for an overview of the results).

286

287 Binomial tests using Age Status on the full sample

288 We examined which items (from item 1-18, 20-21) were associated with age status (item 19).  
289 According to the binomial tests, older dogs bark sooner/more, lick the other's mouth less, win most  
290 fights, and play with the ball and greet the owner less (Table 2). They more often obtained better  
291 resting places and defended the group in case of perceived danger. "Older" dogs were also reported  
292 to be smarter and less impulsive than their partner dog, and they were less often intact, were in  
293 worse physical condition and more often the larger dog in the dyad ( $p < 0.001$ ; see Table 2 for an  
294 overview of the results).

295

296 Comparison of Dominance Status and Age Status as predictor variables

297 Results from two-sample tests for equality of proportions with continuity correction revealed that

298 dominance status was a stronger predictor of eat first, reward, fight, walk first, resting place, defend

299 group, aggressive, and impulsive, in comparison to age status. For one variable, age status tended to

300 be a stronger predictor, lick mouth. However, after correction for multiple comparison the difference

301 between the two proportions was no longer significant (Table 2).

302

303 Binomial tests on the mixed-sex dyad sample

304 In mixed-sex pairs (N = 491), females were more often dominant over males (57% females, binomial

305 test  $z = 3.249$ ,  $p < 0.001$ ; Fig. 2). There was also a higher proportion of neutered individuals compared

306 to intact (58.7% neutered). After correction for chance probability, we found a trend for neutered

307 dogs to be more often dominant than intact dogs (binomial test  $z = 1.95$ ,  $p = 0.025$ , not significant

308 after Bonferroni correction). Moreover, as in the main sample, in mixed-sex dyads dominant

309 individuals were more often older than the subordinates (N=296 dyads, 65% older, binomial test  $z =$

310  $6.38$ ,  $p < 0.001$ ). All of the remaining items that were found to describe dominant individuals in the

311 full sample (bark, lick mouth, eat first, reward, fight, walk first, resting place, defend group, smart,

312 aggressive, and impulsive), were also significant after Bonferroni correction in the mixed pairs

313 subsample, apart from pee; dominant and subordinate individuals were found to mark over each

314 other's urination equally (51% dominants). Please refer to Supplementary Table S1 for more

315 information.

316

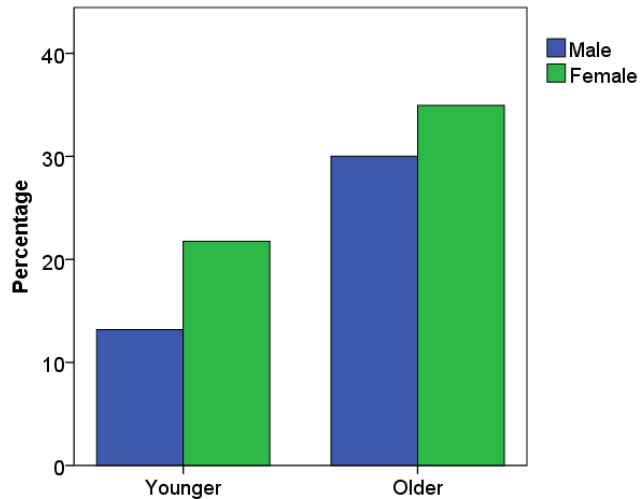

317

318 Figure 2. Percentage distribution of dominant dogs living in mixed sex pairs (N=491) based on their  
319 relative age compared to their partner. Females were reported more often to be dominant than  
320 males ( $p=0.001$ ) and dominant dogs were more often older than the subordinates ( $p<0.001$ ).

321

322 Binomial tests on the same-sex dyad sample

323 In same-sex pairs (N = 512 dyads, 48.5% neutered in the total sample), there was no significant  
324 difference between the number of neutered and intact dominant animals (53% neutered,  $z = 1.86$ ,  $p$   
325 = 0.063). Dominant individuals were again more often older than subordinates (N=319 dyads, 67%  
326 older, binomial test  $z = 7.38$   $p < 0.001$ , Figure 3). As in mixed-sex pairs all the items that best  
327 described dominant individuals also remained significant in the same-sex pairs subsample, with the  
328 addition of pee (dominant individuals marked over subordinates more often in same-sex pairs), and  
329 apart from the item impulsive (i.e. there was no difference in impulsivity between dominants and  
330 subordinates in same-sex pairs). Results can be found in Supplementary Table S1.

331

332



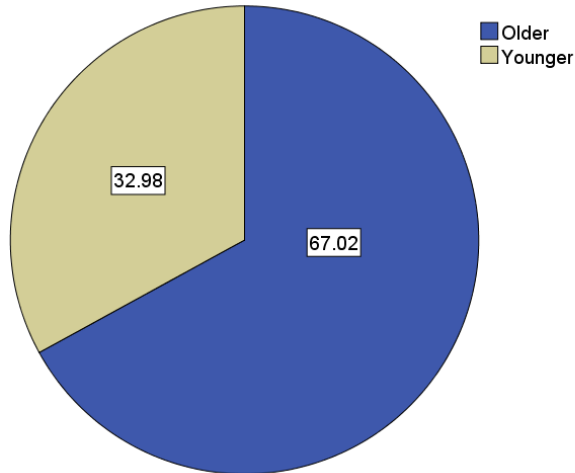

333

334 Figure 3. Distribution of age in dominant dogs living in same-sex (male-male, female-female) pairs  
335 (N=512), based on their relative age compared to their subordinate partner. Older dogs were more  
336 often dominant than young dogs ( $p < 0.001$ ).

337

338 Comparison of dominants in mixed-sex dyads and same-sex dyads

339 Since there were a few differences between mixed-sex and same-sex dyads, we compared the  
340 dominants proportion of each item of each group using a z score calculation. Again, we used  
341 Bonferroni correction for multiple comparisons. Results revealed that dominant individuals in same-  
342 sex dyads do indeed mark over subordinate urinations more often than dominants from mixed-sex  
343 dyads (same-sex 69% and mixed-sex 51%; please refer to Supplementary Table S1). In addition,  
344 dominant individuals were more often neutered in mixed-sex dyads in comparison to same-sex dyads  
345 (mixed-sex 63%, same-sex 53%).

346

347 Comparison of male and female dominants in mixed-sex dyads

348 In our analysis of the mixed-sex subsample, we found that females were more often dominant than  
349 males. In order to determine whether there were differences between the dominant males and  
350 females in each item measured, we compared the dominants proportion of each group (dominant  
351 male and dominant female in mixed-sex group) using a z score calculation. Results are displayed in

352 Table 3. When a male was dominant in a mixed-sex pair, he more often marked over his female  
 353 partner and defended the group in case of perceived danger. In addition, he was often larger in size  
 354 than the female subordinate. Finally, when a female was the dominant individual, she was more  
 355 often neutered than when the male was the dominant (female neutered 72%, male neutered 51%).  
 356

| Item               | Dominant female |       |      | Dominant male |       |      | Proportion difference | Proportion comparison |          |
|--------------------|-----------------|-------|------|---------------|-------|------|-----------------------|-----------------------|----------|
|                    | Count           | Total | Prop | Count         | Total | Prop |                       | Z                     | P        |
| Bark               | 162             | 248   | 0.65 | 106           | 176   | 0.60 | 0.05                  | 1.07                  | 0.2846   |
| Lick mouth         | 125             | 201   | 0.62 | 102           | 155   | 0.66 | -0.04                 | -0.70                 | 0.4839   |
| Eat first          | 128             | 201   | 0.64 | 86            | 147   | 0.59 | 0.05                  | 0.98                  | 0.3271   |
| Reward             | 137             | 187   | 0.73 | 97            | 142   | 0.68 | 0.05                  | 0.98                  | 0.3271   |
| Fight              | 177             | 205   | 0.86 | 112           | 133   | 0.84 | 0.02                  | 0.54                  | 0.5892   |
| Play ball          | 111             | 220   | 0.50 | 81            | 163   | 0.50 | 0.01                  | 0.15                  | 0.8808   |
| Greet owner        | 96              | 175   | 0.55 | 86            | 139   | 0.62 | -0.07                 | -1.25                 | 0.2113   |
| Walk first         | 137             | 222   | 0.62 | 116           | 153   | 0.76 | -0.14                 | -2.87                 | 0.0041   |
| Resting place      | 154             | 197   | 0.78 | 92            | 143   | 0.64 | 0.14                  | 2.82                  | 0.0048   |
| Pee                | 39              | 193   | 0.20 | 138           | 153   | 0.90 | -0.70                 | -12.93                | <0.0001* |
| Defend group       | 127             | 212   | 0.60 | 128           | 150   | 0.85 | -0.25                 | -5.22                 | <0.0001* |
| Smart              | 118             | 183   | 0.64 | 87            | 138   | 0.63 | 0.01                  | 0.27                  | 0.7872   |
| Obedient           | 114             | 228   | 0.50 | 88            | 176   | 0.50 | 0.00                  | 0                     | 1.0000   |
| Aggressive         | 126             | 206   | 0.61 | 114           | 153   | 0.75 | -0.13                 | -2.66                 | 0.0078   |
| Impulsive          | 158             | 255   | 0.62 | 94            | 180   | 0.52 | 0.10                  | 2.03                  | 0.0424   |
| Size: heavier      | 106             | 257   | 0.41 | 128           | 193   | 0.66 | -0.25                 | -5.27                 | <0.0001* |
| Physical Condition | 89              | 184   | 0.48 | 79            | 141   | 0.56 | -0.08                 | -1.37                 | 0.1707   |
| Age: Older         | 159             | 258   | 0.62 | 137           | 197   | 0.70 | -0.08                 | -1.75                 | 0.0801   |
| Neutered           | 203             | 282   | 0.72 | 107           | 210   | 0.51 | 0.21                  | 4.78                  | <0.0001* |

357  
 358 Table 3: Results for mixed-sex dyads by the sex of the dominant. Bold type indicates that social status  
 359 was associated with the characteristic after Bonferroni correction (for the Binomial tests all p values  
 360 are  $\leq 0.0026$  and significant results are indicated with a \*). Prop= Proportion.

361  
 362 Dominance Score and Difference Score  
 363 Dominant dogs had higher dominance scores than subordinates (dominant mean  $\pm$  SD = 6.03 $\pm$ 2.46,  
 364 range = 0-12 vs. 2.92 $\pm$ 1.91, range = 0 – 8, Mann-Whitney U test = -27.326, P <0.001). In comparison,

365 dogs that were rated as similar in status had similar scores ( $3.23 \pm 2.01$ , range = 0 – 9 for Dog A, and  
 366  $3.46 \pm 2.10$ , range = 0 – 11 for Dog B, Mann-Whitney U test = 0.837, P = 0.403).

367

368

|                  | Estimate | Standard error | T value | F      | P     | Partial eta |
|------------------|----------|----------------|---------|--------|-------|-------------|
| Dyad             |          |                |         | 2.2029 | 0.005 | 0.035       |
| FNMI             | -0.948   | 0.268          | -3.540  |        | 0.000 |             |
| FIMI             | -0.875   | 0.308          | -2.837  |        | 0.005 |             |
| FNMN             | -0.694   | 0.262          | -2.647  |        | 0.008 |             |
| FNFN             | -0.577   | 0.252          | -2.286  |        | 0.022 |             |
| FIMN             | -0.703   | 0.344          | -2.042  |        | 0.041 |             |
| MIMI             | -0.495   | 0.261          | -1.896  |        | 0.058 |             |
| MNFN             | -0.515   | 0.281          | -1.829  |        | 0.068 |             |
| MIFN             | -0.401   | 0.299          | -1.342  |        | 0.180 |             |
| MNMN             | -0.377   | 0.309          | -1.220  |        | 0.223 |             |
| FIFI             | -0.280   | 0.266          | -1.050  |        | 0.294 |             |
| FIFN             | -0.406   | 0.393          | -1.033  |        | 0.302 |             |
| FNFI             | -0.272   | 0.317          | -0.858  |        | 0.391 |             |
| MNFI             | -0.272   | 0.325          | -0.836  |        | 0.404 |             |
| MNMI             | 0.174    | 0.314          | 0.555   |        | 0.579 |             |
| MIMN             | -0.161   | 0.445          | -0.360  |        | 0.719 |             |
| MIFI             | -        | -              | -       |        | -     |             |
| Order: Dog B     | -0.407   | 0.138          | -2.941  | 8.6522 | 0.003 | 0.010       |
| Dog A            | -        | -              | -       |        | -     |             |
| Dom age: Younger | 0.320    | 0.127          | 2.520   | 6.3501 | 0.012 | 0.010       |
| Older            | -        | -              | -       |        | -     |             |

369

370 Table 4: Results of the general linear model showing the direction and magnitude of effects and the  
 371 significance level of the terms in the demographic variables associated with “Difference score”.

372 Significant P values (in bold) indicate which group differs from the reference value in the respective  
 373 analysis. (The reference value for categorical variables was set to the last category in the group, and  
 374 is denoted by “-”).

375

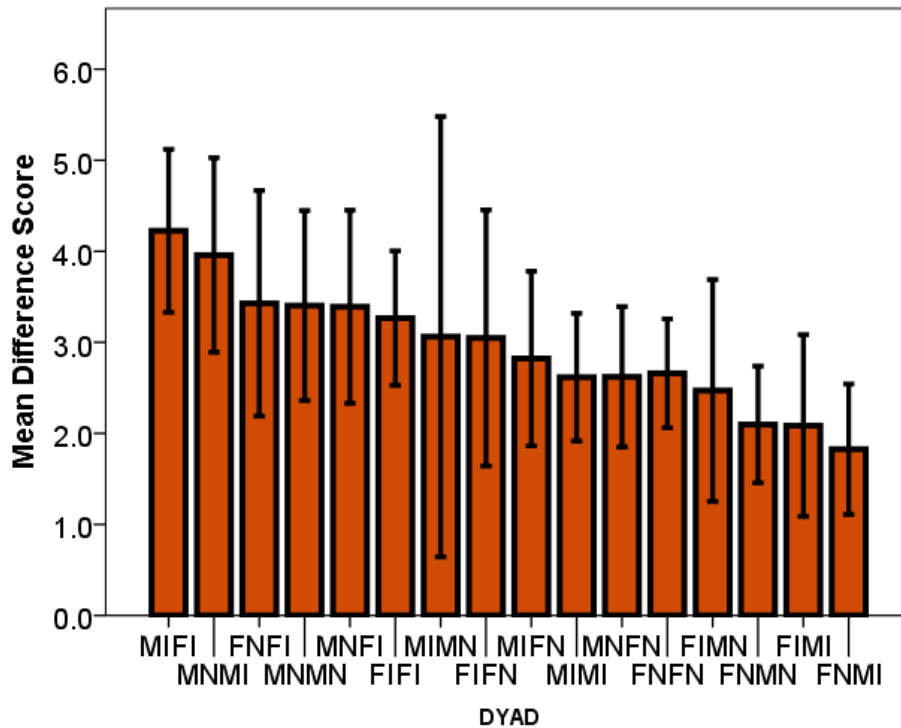

376

377 Figure 4: Mean and 95% confidence intervals of the “Difference score” of the sixteen possible sex and  
378 neuter status combinations of the dyads listed in descending order. The final five combinations  
379 (FNFN, FIMN, FNMN, FIMI, and FNMI) are all significantly different from the comparison group (MIFI)  
380  $p < 0.05$ .

381

382 Results of the general linear model utilising the “Difference score” as the response variable revealed  
383 significant effects of dyad combination, order, and dominant age (Table 4.). However, the overall  
384 variance explained by the model was low (Multiple R-squared: 0.04477, F-statistic: 2.517 on 17 and  
385 913 DF,  $P < 0.001$ ). When using the combination MIFI as the reference category, five dyad  
386 combinations had a significantly lower “Difference score”: FNFN, FIMN, FNMN, FIMI, and FNMI  
387 (Figure 4). Interestingly, when the dominant was the younger animal the “Difference score” was  
388 higher, regardless of dyad combination. There was also a significant order effect. Dominant Dog A-s  
389 differed more from their partners than Dominant Dog B-s.

390

## 391 5. Discussion

392 In this study, we investigated dominance rank predictors in dog dyads using an owner questionnaire.  
393 Eleven different dog-dog or dog-owner oriented behaviours, five behavioural/personality traits and  
394 five demographic factors were examined. Eighty-seven percent of owners labelled one of their dogs  
395 as dominant, which supports that dominance relationships are a robust and well-perceivable  
396 component of companion dog behaviour.

397 We found that within dyads, dominant dogs (1) have priority access to certain resources, (2)  
398 undertake specific tasks, (3) display dominance, (4) have characteristic personality traits and (5) are  
399 usually older than subordinates. More specifically, dominant dogs bark sooner/more, lick the other's  
400 mouth less, eat food and obtain rewards first, win most fights, walk in the front during walks, obtain  
401 better resting places, mark over the other's pee, defend the group in case of perceived danger, are  
402 smarter, more aggressive, more impulsive, and older than their partner. Physical condition,  
403 obedience, sequence of greeting the owner and retrieving balls were unrelated to dominance.  
404 Results were the same in the full sample and in the subsamples of mixed-sex and same-sex dyads,  
405 except for pee (mark over), which did not differ between dominants and subordinates in mixed-sex  
406 dyads.

407 In contrast to the age related hypothesis, which suggests that age explains formal dominance in dogs  
408 [26], we found that dominance status, as perceived by the owner, was a better predictor than age  
409 status for 11 of the items examined.

410 Thirteen percent of owners were unable to determine a clear rank order between their dogs. This  
411 may be because (1) the owner has more than two dogs and these two are closer in rank or have a  
412 non-interactive or 'egalitarian' relationship; (2) the dogs may not have lived together long enough to  
413 form a clear rank order; (3) the owner might actively work against the dogs displaying dominance  
414 behaviour, preventing situations in which rank could form from happening (e.g. chasing away the  
415 dominant dog from the better resting place, not allowing the dominant to feed first, prevented

416 fights, and favouring the loser dog, etc.); (4) the owner does not accept/understand the concept of  
417 dominance.

418 Items that previously were convincingly associated with dominance, such as bark first or more often,  
419 lick mouth (reverse coded), eat first and fight [38], predicted the owner's estimate of dominance in  
420 the present study too. Note however, that 28-34.1% of owners indicated that their dogs do not lick  
421 each other's mouths and never fight with each other (or are similar in this regard); therefore, these  
422 items are not predictive in a third of the population.

423 Items related to obtaining resources (resting place, eating first, and getting food rewards first) square  
424 with the classical definition of dominance by [42], which maintains that dominant individuals have  
425 priority access to resources. However, items that examined control over other resources, such as a  
426 ball and the owner (greeting), were not different between "dominant" and "subordinate" dogs.

427 Three of the items used in the current study, mouth licking, pee, and win fights are related to  
428 dominance displays established through ethological fieldwork that are easy to observe for lay people.  
429 These displays were associated with the owner's estimate of the dog's rank, indicating that owner-  
430 derived reports about dominance ranks have external validity.

431 Mouth licking was more often observed among subordinate dogs. This behaviour may be derived  
432 from food begging behaviour and it is part of the submission ritual, most often during greetings, both  
433 in wolves [43,44], and dogs [6,11].

434 Owners indicated that dogs higher in status over mark lower ranking dogs. One previous study  
435 reported that dogs' rate of countermarking indicated high status in both male and female dogs [45].  
436 However, in the current study, detailed analysis showed that dominants in same-sex dyads mark over  
437 subordinate urinations more often than dominants from mixed-sex dyads. However, when a male  
438 was dominant in a mixed-sex pair, he more often marked over his female partner (and also defended  
439 the group in case of perceived danger). Results suggests that for females intra-sexual competition  
440 may be prioritised over intersexual competition.

441 According to their owners, 24.1% of dyads never fight, a result which is in harmony with the finding  
442 that aggression in companion dogs is rare and usually of low intensity [12]. However, 65.9% of dyads  
443 do fight. Aggression between dogs in the same household has been interpreted as disputes over  
444 dominance by several authors [17,46]. In free-ranging dogs, dominance relationships were based on  
445 agonistic interactions, and were correlated with priority access to food [47].

446 Aggression levels are likely to increase when there is direct competition for resources (which can  
447 include the owner), and previous experiences have led to success in agonistic interactions. In  
448 addition, aggression towards other dogs in the household has been associated with increasing age in  
449 previous studies, number of dogs in the household, and with the type of training techniques used by  
450 the owner [21]. Context-specific associative learning can help to clarify the complexities of social  
451 interaction, and provides an explanation of why the relationship between dyads of dogs can change  
452 from one situation to another (for example when competing for access to food, and over a favourite  
453 toy) [48,49]. Additionally, context-specific associative learning can explain why dogs do not tend to  
454 show aggression in multiple contexts [21].

455 Items theoretically concerning the responsibilities that come with a higher status were also  
456 associated with dominance. According to the owners, dominant dogs defend the group during  
457 perceived or actual threats, bark more when a stranger comes to the house, and lead other dog/s  
458 during walks, in harmony with previous findings on dominance-leadership associations [25].

459 Dominant dogs were reported to have certain personality traits: they were more aggressive,  
460 impulsive and smarter than subordinates were. In a small group of dogs aggression towards people,  
461 controllability, and leadership were associated with dominance [25]. Results suggest that these  
462 personality traits influence social relationships.

463 Aggressivity as a personality trait increases the likelihood of exhibiting dominance via agonistic  
464 interactions. Depending on whether dogs in the dyad affiliate or not, they can form formal or  
465 agonistic dominance (see also [5]). Unfortunately in our study affiliation was only measured using the

466 item “lick mouth”, which is also a signal of submission, therefore we could not distinguish between  
467 these two dominance types [12].

468 Impulsivity is also associated with dominance in the full and the mixed-sex sample. Without utilising  
469 a multi-dimensional assessment of impulsivity (for example, as used in [50]), impulsivity is difficult to  
470 distinguish from aggression, although it can alternatively co-vary with anxiety, too [51]. The fact that  
471 impulsivity did not differ between dominant and subordinate individuals in same-sex pairs indicates  
472 that intrasexual competition may influence impulsivity in dogs, or there is a sex difference in  
473 impulsivity.

474 ‘Smartness’ could be an important mediator of both dominance and leadership. In smaller packs (i.e.  
475 nuclear families in wolves), apparent dominance can be observed as the parents exert parental  
476 guidance over their offspring. Mathematical models predict, that the fitness of group members  
477 increases if the dominant individual is experienced with the group’s surroundings, thus it is  
478 advantageous for the group if the knowledge of dominant individuals exceeds that of other members  
479 [40,41]. Based on the data on free-ranging dogs, Bonanni et al. [7] assumed that age and experience  
480 play a part in maintaining the rank of dominants. If the owner’s estimate of dog-smartness is a good  
481 reflection of the dog’s knowledge and cognitive skill, the association between leadership and  
482 dominance could be based on the underlying association between smartness and dominance.

483 However, it is also possible that owners attribute higher intellect to the dominants or alternatively,  
484 subordinate dogs do not show their full potential (e.g. they are stressed and or inhibited by the  
485 dominant).

486 As predicted, older individuals were more often allocated a higher status by owners in the full  
487 sample, and in both subsamples (mixed and same-sex pairs). Previous studies in wolves, free ranging  
488 dogs, and pet dogs confirm that older individuals are more likely to be dominant and/or leaders  
489 [6,7,12,28,44,52]. In addition, older dogs have usually stayed within the family home for longer than  
490 younger dogs, a factor, which contributes to their level of experience and knowledge.



491 An interesting and unexpected finding in the current study is that females were perceived by owners  
492 as more dominant than males in mixed-sex dog dyads. This is surprising, because in captive wolves,  
493 formal submission (see definition by de Waal [5]) was found to be consistently asymmetrical in  
494 favour of males (i.e. females submitted more to their male partners [27]). Some authors have  
495 concluded that among wolves the breeding male is more dominant [32,33]. However sex had no  
496 clear effect on dominance in a family pack of captive arctic wolves, although sex separated linear  
497 hierarchies showed a stronger linearity than female-male hierarchies [44]. Male free-ranging dogs  
498 are usually also dominant over females [47].

499 One reason why female dogs dominate males more often in mixed-sex dyads could be due to the fact  
500 that dominant females were more often neutered than dominant males. Previous studies have  
501 determined that hormonal activity influences inter-dog aggression [29]. Aggression has been found  
502 to increase in neutered females [53], so that the observed effect of reproductive status in our study  
503 may present an aggression-based amplification of the female dominance behaviour. Females were  
504 able to dominate males even though in 59% of the dyads they were smaller in size than their male  
505 partner. Note that dominant females were not observed to be more aggressive than dominant  
506 males. There does not appear to be a similar effect of neutering on males; in mixed-sex dyads,  
507 dominant males were equally likely to be neutered or intact. Our results are in line with previous  
508 data, which indicated that hierarchy formation did not seem to be affected by even prepubertal  
509 castration [54]. However, in the current study, dominant males were more likely to defend the group  
510 and to mark over their subordinate, than dominant females. Which indicates that dominant females  
511 may be taking on only some of the characteristics of a dominant animal. Future studies should  
512 examine whether neutered female dogs usually lean towards the agonistic dominance style.

513 On average, individuals that were labelled as “dominant” expressed the traits and features that were  
514 identified as those that are characteristic of a dominant animal to a greater extent than  
515 subordinates, as measured through the dominance difference score. Although there was quite some  
516 variation in both dominant and subordinate individuals, which reflects the complex nature of social

517 relationships, and the influence of context and previous experience on behaviour. The dyad that  
518 showed the greatest difference score between the dominant and subordinate (and therefore the  
519 clearest status or relationship difference) was in a mixed sex dyad when an intact male was dominant  
520 over an intact female. Which partially collaborates the suggestion that mixed sex dog dyads tend to  
521 have more defined relationships, in comparison to same sex pairs [19]. However, in the current  
522 study, when a male was dominant in a mixed sex pair, he more often marked over his female partner  
523 and defended the group in case of perceived danger, than when a female was dominant. Therefore,  
524 male dominants received a higher dominance score than female dominants in mixed sex groups.  
525 Which points to a possible sex influence on some dominance related behaviours.

526 This assumption is further supported when comparing the difference score of dyads with an intact  
527 male dominant and an intact female subordinate with all other possible dyads. Results revealed that  
528 mixed-sex dyads with dominant females (FIMI, FNMI, FNMN, and FIMN), had significantly lower  
529 difference scores. Dominant males may be performing mate-guarding behaviour in an attempt to  
530 control intact females mating opportunities. This behaviour includes increased urine marks on or  
531 near a females urine spots, which serves to hide the odour trail of an oestrous female from other  
532 dogs [55]. When female free-ranging dogs are in heat, males tend to become more aggressive  
533 towards each other, and hierarchies become more pronounced during this time [56]. However, this  
534 does not explain why for some owners of intact mixed sex dyads the female was perceived as  
535 dominant. There is evidence from humans that socially dominant males and females are more similar  
536 in behavioural profiles (regardless of age), than is commonly believed [57]. Biologists have  
537 underrated overt competitiveness in females, as evolutionary and biological approaches suggested  
538 that social dominance is predominately an aspect of male social organization.

539 In pre-schoolers, caretaker assessments of dominance status was found to be a valid means to divide  
540 children into dominant and subordinate groups, as those designated as socially dominant were more  
541 likely to control a desired resource in a play situation [58]. Age, but not sex was found to predict  
542 social dominance; however, in a similar result to the current study, caretakers did not merely order

543 the children by age, as additional factors such as personality traits (assertiveness and extraversion),  
544 and friendship modulate dominance behaviour. Hawley [58] concludes that social dominance is not a  
545 single-indicator construct, as individuals vary in their resource-directed behaviour and are not equal  
546 in their abilities and/or motivation to pursue resources in the presence of others.

547 Although McGreevy et al. [19] suggested that mixed-sex dog dyads tend to have more defined  
548 relationships, in comparison to same-sex pairs, we did not find any differences in the behaviour of  
549 dominants in mixed-sex and same-sex pairs, apart from in the proportion of dogs that marked over  
550 subordinates (see above), and the number of neutered individuals. Dominant individuals were more  
551 often neutered in mixed-sex dyads in comparison to same-sex dyads. This is not surprising when we  
552 consider the difficulties of keeping intact males and females together in the same household.

553 An additional confound is that as dogs age, the chance of reproductive problems increases especially  
554 in females, which leads to an increase in neutered individuals with age. Pyometra (an infection in the  
555 uterus), is one of the most common diseases affecting over 50% of all intact females before 10 years  
556 of age [59]. Older intact male dogs have an increased risk of prostatic disorders, which affects more  
557 than 80% of male dogs over 5 years of age [60]. Therefore, older individuals are more likely to be  
558 neutered than younger individuals among groups of dogs where the owners' common practice is to  
559 keep them sexually intact for as long as possible (for example breeders and people who show their  
560 pedigree dogs). In line with this fact, we found that dominant individuals in the full sample were  
561 more often neutered and older, than intact and older.

562 In the full sample and in both subsamples (same-sex and mixed-sex dyads), size was unrelated to  
563 dominance ranks, as has previously been found in pet dogs [12]. However, when we examined the  
564 differences between dominant males and dominant females in mixed-sex dyads, we found that  
565 dominant males were more often larger than their partner. The domestic dog is the most  
566 morphologically variable mammalian species [61]. Male-larger sexual size dimorphism is present in  
567 most dog breeds and in larger breeds is comparable to their wolf ancestor [62]. Therefore, larger,  
568 heavier males have an advantage over smaller, lighter females, which can result in males successfully

569 out competing females for resources, and potentially becoming dominants. However, since sexual  
570 size dimorphism becomes smaller with decreasing body size (a pattern termed Rensch's rule [62]),  
571 smaller breeds are nearly monomorphic, which could result in increased numbers of females  
572 attaining a dominant position.

573 By examining the proportion of dyads found in each of the sixteen possible dominance, sex and  
574 neuter status combinations, we were able to determine common patterns in keeping practices within  
575 our sample. Either owners tended to keep all their dogs intact and in same-sex dyads, or they were  
576 all neutered. This finding could indicate that owners kept multiple pedigree dogs, that need to  
577 remain intact for breeding and showing purposes, or they kept multiple mixed breed dogs possibly  
578 obtained from shelters, where it is the common practice to neuter the individuals. Alternatively, it  
579 could reflect differences in owner attitudes to neutering [63]. Unfortunately, we did not obtain  
580 information on either the breed, the origin of the dog, the age at acquisition, or the reason for  
581 neutering, and therefore further studies are necessary to elucidate the relationship between early  
582 life experiences, owner breed preferences, neutering attitudes, and dominance relationships  
583 between same and mixed-sex groups.

584

## 585 6. Conclusion

586 Our study has several limitations, such as the fact that only relationships between single dyads were  
587 examined. Previous work has determined that individuals can and do establish different types of  
588 relationships including "friendships", when paired with different individuals, and these relationships  
589 can also change over time, suggesting high social complexity in dogs [13]. Future studies should  
590 examine how individuals' relationships differ within multi-dog households. Unfortunately, we did not  
591 include items on affiliative behaviour in the questionnaire, so it was not possible to classify the  
592 dominance relationships further into formal (affiliation and dominance), and egalitarian (affiliated  
593 with no dominance) types. Additionally, we were not able to examine breed differences in

594 dominance relationships because larger sample sizes would be necessary. Finally, due to time  
595 constraints, we applied single item statements to describe personality traits.  
596 However, our study opens up the way for a better understanding of dominance in dogs and  
597 highlights the usefulness of citizen science when studying animal behaviour. Based on our data, we  
598 suggest for future studies that wish to allocate dominance status using owner report, to include the  
599 following six items: Which dog starts to eat first, obtains the reward, walks in the front, acquires the  
600 better resting place, defends the group, and is more aggressive. However, asking which dog wins  
601 fights or which dog licks the mouth of the other might also be useful as both were highly predictive  
602 of social status if they do occur (in approx. 70% of cases).

603

#### 604 **Acknowledgement**

605 We thank Borbála Turcsán for her contribution to the design of the questionnaires, and for her  
606 helpful comments on an earlier version of the manuscript. Ivaylo B. Iotchev helped with the literature  
607 search and discussions during the manuscript writing.

608

#### 609 **Ethical statement**

610 The procedures applied complied with national and EU legislation and institutional guidelines.  
611 Participants were informed about the identity of the researchers, the aim, procedure, and expected  
612 time commitment of filling out the survey. Owners filled out the survey anonymously; therefore, we  
613 did not collect personal data. Participants could at any point decline to participate.

614

#### 615 **Funding statement**

616 This project has received funding from the European Research Council (ERC) under the European  
617 Union's Horizon 2020 research and innovation program (Grant Agreement No. 680040), from the  
618 János Bolyai Research Scholarship of the Hungarian Academy of Sciences, and from the ÚNKP-Bolyai+  
619 Scholarship for EK.

## 620 **Data Accessibility**

621 The datasets supporting this article have been uploaded as part of the Supplementary Material.

622

## 623 **Competing Interests**

624 The authors declare that they have no conflict of interest.

625

## 626 **Authors' Contributions**

627 Enikő Kubinyi – experimental design, data collection, explorative analysis, writing, final analysis

628 Lisa Wallis – final analysis, writing

629

## 630 **References**

- 631 1. Clutton-Brock TH, Albon SD, Gibson RM, Guinness FE. 1979 The logical stag: Adaptive aspects  
632 of fighting in red deer (*Cervus elaphus* L.). *Anim. Behav.* **27**, 211–225. (doi:10.1016/0003-  
633 3472(79)90141-6)
- 634 2. Drews C. 1993 The Concept and Definition of Dominance in Animal Behavior. *Behavior* **125**  
635 **(3)**, 283–313. (doi:10.1017/CBO9781107415324.004)
- 636 3. Lorenz K. 1966 *On Aggression*. London: Methuen.
- 637 4. Smith JM, Price GR. 1973 The Logic of Animal Conflict. *Nature* **246**, 15–18.  
638 (doi:10.1038/246015a0)
- 639 5. de Waal FBM. 1989 Dominance 'style' and primate social organization. In *Comparative*  
640 *Socioecology: The Behavioural Ecology of Humans and other Mammals*, pp. 243–263.
- 641 6. Cafazzo S, Valsecchi P, Bonanni R, Natoli E. 2010 Dominance in relation to age, sex, and  
642 competitive contexts in a group of free-ranging domestic dogs. *Behav. Ecol.* **21**, 443–455.  
643 (doi:10.1093/beheco/arq001)
- 644 7. Bonanni R, Cafazzo S, Valsecchi P, Natoli E. 2010 Effect of affiliative and agonistic relationships  
645 on leadership behaviour in free-ranging dogs. *Anim. Behav.* **79**, 981–991.

- 646 (doi:10.1016/j.anbehav.2010.02.021)
- 647 8. Bonanni R, Cafazzo S. 2014 The Social Organisation of a Population of Free-Ranging Dogs in a  
648 Suburban Area of Rome. In *The Social Dog*, pp. 65–104. Elsevier. (doi:10.1016/B978-0-12-  
649 407818-5.00003-6)
- 650 9. Dale R, Range F, Stott L, Kotrschal K, Marshall-Pescini S. 2017 The influence of social  
651 relationship on food tolerance in wolves and dogs. *Behav. Ecol. Sociobiol.* **71**.  
652 (doi:10.1007/s00265-017-2339-8)
- 653 10. Range F, Ritter C, Viranyi Z. 2015 Testing the myth: tolerant dogs and aggressive wolves. *Proc.*  
654 *R. Soc. B Biol. Sci.* **282**, 20150220. (doi:10.1098/rspb.2015.0220)
- 655 11. Van Der Borg JAM, Schilder MBH, Vinke CM, De Vries H, Petit O. 2015 Dominance in domestic  
656 dogs: A quantitative analysis of its behavioural measures. *PLoS One* **10**.  
657 (doi:10.1371/journal.pone.0133978)
- 658 12. Trisko RK, Smuts BB. 2015 Dominance relationships in a group of domestic dogs (*Canis lupus*  
659 *familiaris*). *Behaviour* **152**, 677–704. (doi:10.1163/1568539X-00003249)
- 660 13. Trisko RK, Smuts B, Sandel AA. 2016 Affiliation, dominance and friendship among companion  
661 dogs. *Behaviour* **153**, 693–725. (doi:10.1163/1568539X-00003352)
- 662 14. Schilder MBH, Vinke CM, Borg JAM Van Der. 2014 Dominance in domestic dogs revisited:  
663 useful habit and useful construct? *J. Vet. Behav.* (doi:10.1016/j.jveb.2014.04.005)
- 664 15. Westgarth C. 2016 Why nobody will ever agree about dominance in dogs. *J. Vet. Behav. Clin.*  
665 *Appl. Res.* **11**, 99–101. (doi:10.1016/j.jveb.2015.02.004)
- 666 16. Overall KL. 2016 Special issue: The “dominance” debate and improved behavioral measures—  
667 Articles from the 2014 CSF/FSF. *J. Vet. Behav. Clin. Appl. Res.* **11**, 1–6.  
668 (doi:10.1016/j.jveb.2015.12.004)
- 669 17. van Kerkhove W. 2004 A Fresh Look at the Wolf-Pack Theory of Companion-Animal Dog Social  
670 Behavior. *J. Appl. Anim. Welf. Sci.* **7**, 279–285.
- 671 18. Bradshaw JWS, Blackwell EJ, Casey RA. 2009 Dominance in domestic dogs-useful construct or

- 672 bad habit? *J. Vet. Behav. Clin. Appl. Res.* **4**, 135–144. (doi:10.1016/j.jveb.2008.08.004)
- 673 19. McGreevy PD, Starling M, Branson NJ, Cobb ML, Calnon D. 2012 An overview of the dog-  
674 human dyad and ethograms within it. *J. Vet. Behav. Clin. Appl. Res.* **7**, 103–117.  
675 (doi:10.1016/j.jveb.2011.06.001)
- 676 20. Bradshaw JWS, Blackwell E, Casey RA. 2016 Dominance in domestic dogs—A response to  
677 Schilder et al. (2014). *J. Vet. Behav. Clin. Appl. Res.* **11**, 102–108.  
678 (doi:10.1016/j.jveb.2015.11.008)
- 679 21. Casey RA, Loftus B, Bolster C, Richards GJ, Blackwell EJ. 2013 Inter-dog aggression in a UK  
680 owner survey: Prevalence, co-occurrence in different contexts and risk factors. *Vet. Rec.* **172**,  
681 127. (doi:10.1136/vr.100997)
- 682 22. Casey RA, Loftus B, Bolster C, Richards GJ, Blackwell EJ. 2014 Human directed aggression in  
683 domestic dogs (*Canis familiaris*): Occurrence in different contexts and risk factors. *Appl. Anim.*  
684 *Behav. Sci.* **152**, 52–63. (doi:10.1016/j.applanim.2013.12.003)
- 685 23. Jones AC, Gosling SD. 2005 Temperament and personality in dogs (*Canis familiaris*): A review  
686 and evaluation of past research. *Appl. Anim. Behav. Sci.* **95**, 1–53.  
687 (doi:10.1016/j.applanim.2005.04.008)
- 688 24. Fratkin JL, Sinn DL, Patall EA, Gosling SD. 2013 Personality Consistency in Dogs: A Meta-  
689 Analysis. *PLoS One* **8**, e54907. (doi:10.1371/journal.pone.0054907)
- 690 25. Ákos Z, Beck R, Nagy M, Vicsek T, Kubinyi E. 2014 Leadership and Path Characteristics during  
691 Walks Are Linked to Dominance Order and Individual Traits in Dogs. *PLoS Comput. Biol.* **10**.  
692 (doi:10.1371/journal.pcbi.1003446)
- 693 26. Bradshaw JWS, Blackwell E, Casey RA. 2016 Dominance in domestic dogs - A response to  
694 Schilder et al. (2014). *J. Vet. Behav. Clin. Appl. Res.* **11**, 102–108.  
695 (doi:10.1016/j.jveb.2015.11.008)
- 696 27. Mech LD. 1999 Alpha status, dominance, and division of labor in wolf packs. *Can. J. Zool.* **77**,  
697 1196–1203. (doi:10.1139/z99-099)



- 698 28. Bonanni R, Cafazzo S, Abis A, Barillari E, Valsecchi P, Natoli E. 2017 Age-graded dominance  
699 hierarchies and social tolerance in packs of free-ranging dogs. *Behav. Ecol.* **28**, 1004–1020.  
700 (doi:10.1093/beheco/arx059)
- 701 29. Sherman CKC, Reisner IRIIR, Taliaferro LA, Houpt KA. 1996 Characteristics, treatment, and  
702 outcome of 99 cases of aggression between dogs. *Appl. Anim. Behav. Sci.* **47**, 91–108.  
703 (doi:10.1016/0168-1591(95)01013-0)
- 704 30. Wrubel KM, Moon-Fanelli AA, Maranda LS, Dodman NH. 2011 Interdog household aggression:  
705 38 cases (2006–2007). *J. Am. Vet. Med. Assoc.* **238**, 731–740. (doi:10.2460/javma.238.6.731)
- 706 31. Packard JM. 2003 Wolf behaviour: reproductive, social and intelligent. In *Wolves: Behavior,*  
707 *Ecology and Conservation* (eds LD Mech, L Boitani), pp. 35–65. Chicago, IL: University of  
708 Chicago Press.
- 709 32. Clark K. 1971 Food habits and behavior of the tundra wolf on central Baffin Island.
- 710 33. Haber G. 1977 Socio-ecological dynamics of wolves and prey in a subarctic ecosystem.
- 711 34. Starling MJ, Branson N, Thomson PC, McGreevy PD. 2013 Age, sex and reproductive status  
712 affect boldness in dogs. *Vet. J.* **197**, 868–872. (doi:10.1016/j.tvjl.2013.05.019)
- 713 35. Turcsán B, Kubinyi E, Miklósi Á. 2011 Trainability and boldness traits differ between dog breed  
714 clusters based on conventional breed categories and genetic relatedness. *Appl. Anim. Behav.*  
715 *Sci.* **132**, 61–70. (doi:10.1016/j.applanim.2011.03.006)
- 716 36. van der Borg J a M, Schilder MBH, Vinke CM. 2012 Dominance and its behavioural measures in  
717 a pack of domestic dogs. *Proc. Canine Sci. Forum* , 15.
- 718 37. Hecht J, Spicer Rice E. 2015 Citizen science: A new direction in canine behavior research.  
719 *Behav. Processes* **110**, 125–132. (doi:10.1016/J.BEPROC.2014.10.014)
- 720 38. Pongrácz P, Vida V, Bánhegyi P, Miklósi Á. 2008 How does dominance rank status affect  
721 individual and social learning performance in the dog (*Canis familiaris*)? *Anim. Cogn.* **11**, 75–  
722 82. (doi:10.1007/s10071-007-0090-7)
- 723 39. Pongrácz P, Bánhegyi P, Miklósi Á. 2012 When rank counts — dominant dogs learn better

- 724 from a human demonstrator in a two-action test. *Behaviour* **149**, 111–132.  
725 (doi:10.1163/156853912X629148)
- 726 40. Conradt L, Roper TJ. 2005 Consensus decision making in animals. *Trends Ecol. Evol.* **20**, 449–  
727 456. (doi:10.1016/j.tree.2005.05.008)
- 728 41. Conradt L, Roper TJ. 2003 Group decision-making in animals. *Nature* **421**, 155–158.  
729 (doi:10.1038/nature01294)
- 730 42. Schjelderup-Ebbe, T. 1922 Beiträge zur Sozialpsychologie des Haushuhns. *Zeitschrift für*  
731 *Psychol. und Physiol. der Sinnesorgane. Abt. 1. Zeitschrift für Psychol.*
- 732 43. Schenkel R. 1967 Submission: Its features and function in the wolf and dog. *Integr. Comp. Biol.*  
733 **7**, 319–329. (doi:10.1093/icb/7.2.319)
- 734 44. Cafazzo S, Lazzaroni M, Marshall-Pescini S. 2016 Dominance relationships in a family pack of  
735 captive arctic wolves (*Canis lupus arctos*): the influence of competition for food, age and sex.  
736 *PeerJ* **4**, e2707. (doi:10.7717/peerj.2707)
- 737 45. Lisberg AE, Snowdon CT. 2011 Effects of sex, social status and gonadectomy on  
738 countermarking by domestic dogs, *Canis familiaris*. *Anim. Behav.* **81**, 757–764.  
739 (doi:10.1016/j.anbehav.2011.01.006)
- 740 46. Landsberg GM, Hunthausen WL, Ackerman LJ. 2003 The effects of aging on behavior in senior  
741 pets. In *Behavior Problems of the Dog and Cat* (ed Saunders), pp. 269–280. Philadelphia, PA:  
742 Elsevier Health Sciences.
- 743 47. Cafazzo S, Valsecchi P, Bonanni R, Natoli E. 2010 Dominance in relation to age, sex, and  
744 competitive contexts in a group of free-ranging domestic dogs. *Behav. Ecol.* **21**, 443–455.  
745 (doi:10.1093/beheco/arq001)
- 746 48. Mertens PA. 2002 Canine aggression. In *BSAVA Manual of Canine and Feline Behavioural*  
747 *Medicine* (eds DF Horwitz, DS Mills, S Heath), pp. 195–215. Quedgeley, UK: BSAVA.
- 748 49. Shepherd K. 2002 Development of behaviour, social behaviour and communication in dogs. In  
749 *BSAVA Manual of Canine and Feline Behavioural Medicine* (eds DF Horwitz, DS Mills, S Heath),

- 750 pp. 8–20. Quedgeley, UK: BSAVA.
- 751 50. Wright HF, Mills DS, Pollux PMJ. 2011 Development and validation of a psychometric tool for  
752 assessing impulsivity in the domestic dog (*Canis familiaris*). *Int. J.* , 210–225.
- 753 51. King C, Smith TJ, Grandin T, Borchelt P. 2016 Anxiety and impulsivity: Factors associated with  
754 premature graying in young dogs. *Appl. Anim. Behav. Sci.* **185**, 78–85.  
755 (doi:10.1016/j.applanim.2016.09.013)
- 756 52. Peterson RO, Jacobs AK, Drummer TD, Mech LD, Smith DW. 2002 Leadership behavior in  
757 relation to dominance and reproductive status in gray wolves, *Canis lupus*. *Can. J. Zool.* **80**,  
758 1405–1412. (doi:10.1139/z02-124)
- 759 53. Wright JC, Nesselrote MS. 1987 Classification of behavior problems in dogs: Distributions of  
760 age, breed, sex and reproductive status. *Appl. Anim. Behav. Sci.* **19**, 169–178.  
761 (doi:10.1016/0168-1591(87)90213-9)
- 762 54. Le Boeuf BJ. 1970 Copulatory and aggressive behavior in the prepuberally castrated dog.  
763 *Horm. Behav.* **1**, 127–136. (doi:10.1016/0018-506X(70)90005-X)
- 764 55. Dunbar I, Buehler M. 1980 A masking effect of urine from male dogs. *Appl. Anim. Ethol.* **6**,  
765 297–301. (doi:10.1016/0304-3762(80)90030-9)
- 766 56. Daniels TJ. 1983 The social organization of free-ranging urban dogs. II. estrous groups and the  
767 mating system. *Appl. Anim. Ethol.* **10**, 365–373. (doi:10.1016/0304-3762(83)90185-2)
- 768 57. Hawley PH, Little TD, Card NN. 2008 The myth of the alpha male: A new look at dominance-  
769 related beliefs and behaviors among adolescent males and females. *Int. J. Behav. Dev.* **32**, 76–  
770 88. (doi:10.1177/0165025407084054)
- 771 58. Hawley PH. 2002 Social dominance and prosocial and coercive strategies of resource control  
772 in preschoolers. *Int. J. Behav. Dev.* **26**, 167–176. (doi:10.1080/01650250042000726)
- 773 59. Egenvall A, Hagman R, Bonnett BN, Hedhammar A, Olson P, Lagerstedt A-S. 2001 Breed Risk of  
774 Pyometra in Insured Dogs in Sweden. *J. Vet. Intern. Med.* **15**, 530–538. (doi:10.1111/j.1939-  
775 1676.2001.tb01587.x)

- 776 60. Johnston S., Kamolpatana K, Root-Kustritz M., Johnston G. 2000 Prostatic disorders in the dog.  
777 *Anim. Reprod. Sci.* **60–61**, 405–415. (doi:10.1016/S0378-4320(00)00101-9)
- 778 61. Drake AG, Klingenberg CP. 2010 Large-Scale Diversification of Skull Shape in Domestic Dogs:  
779 Disparity and Modularity. *Am. Nat.* **175**, 289–301. (doi:10.1086/650372)
- 780 62. Frynta D, Baudyšová J, Hradcová P, Faltusová K, Kratochvíl L. 2012 Allometry of Sexual Size  
781 Dimorphism in Domestic Dog. *PLoS One* **7**, 5–10. (doi:10.1371/journal.pone.0046125)
- 782 63. Blackshaw JK, Day C. 1994 Attitudes of dog owners to neutering pets: demographic data and  
783 effects of owner attitudes. *Aust. Vet. J.* **71**, 113–6. (doi:10.1111/j.1751-0813.1994.tb03351.x)
